# Supplementary material for: Joint Trajectories of Spousal Social Support and Depressive Symptoms in Older Age
Source: PubMed Central journal article supplement (PMC6495403; doi:10.1177/0898264317747077), 2017-12-14
Supplement: Supplementary_Figures.pdf [file Supplementary_Figures.pdf]

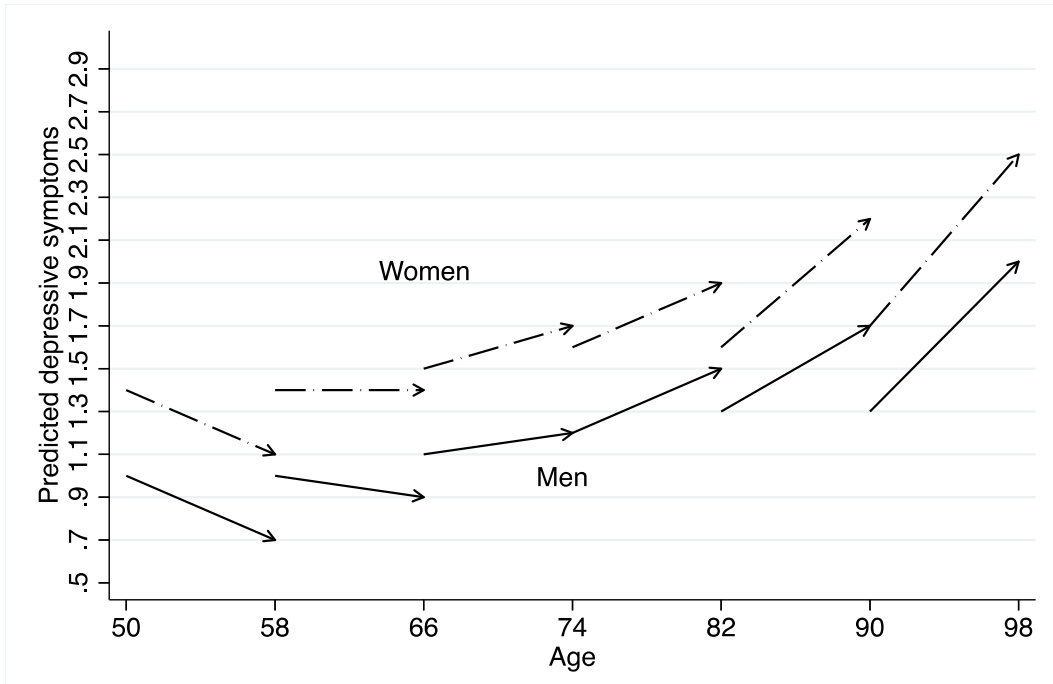

Figure 1

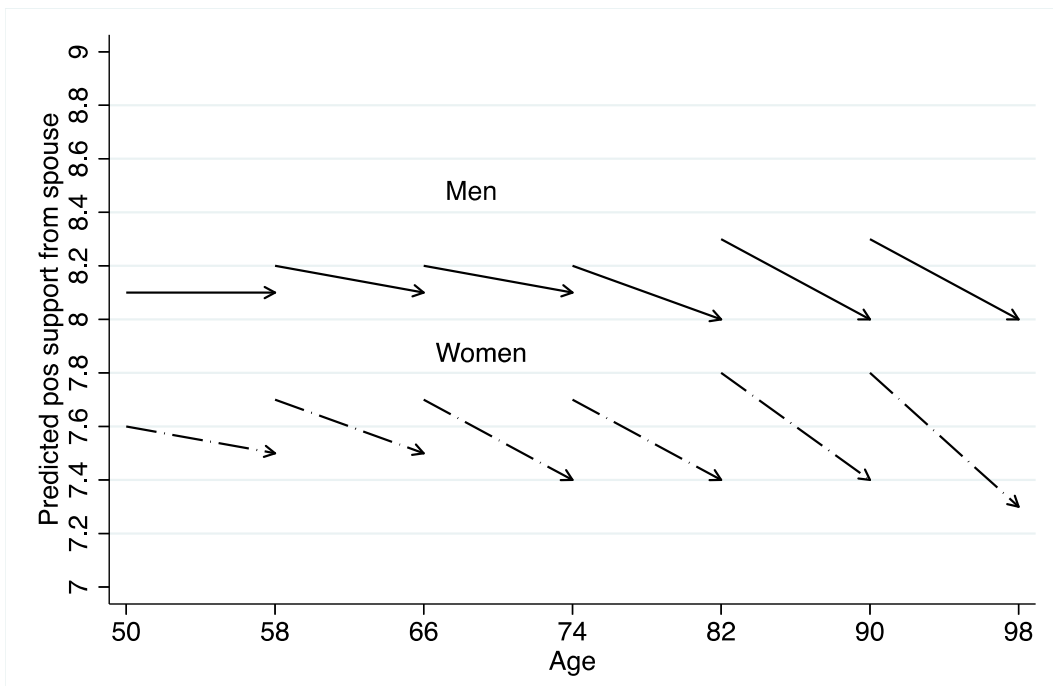

Figure 2

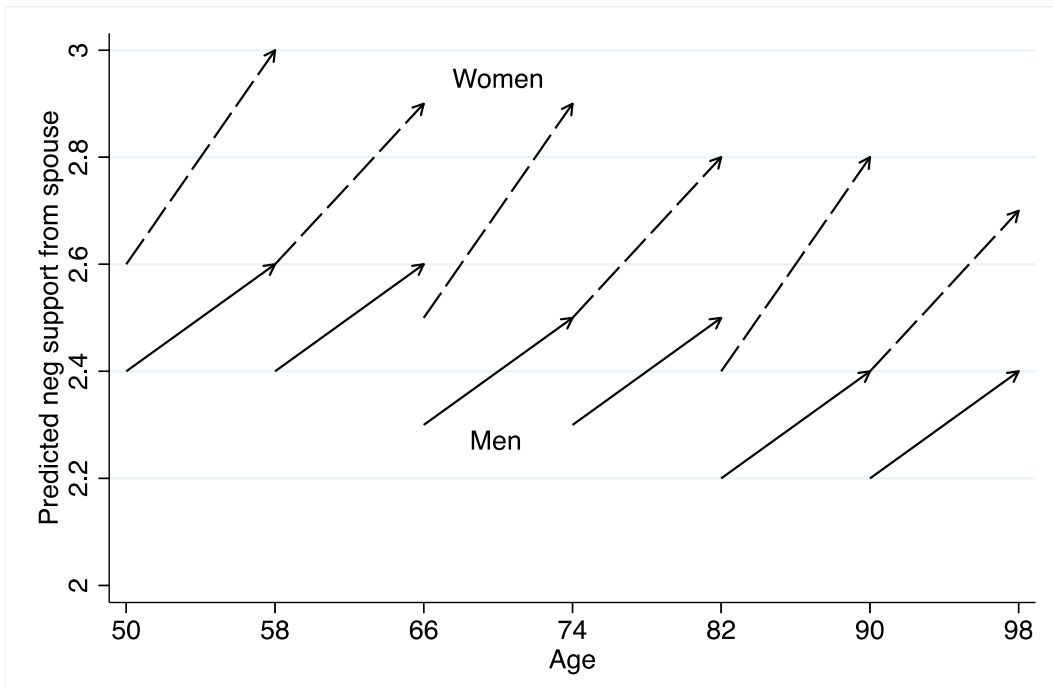

Figure 3
